# Supplementary material
Source: Springer Nature journal article supplement (https://www.springermedizin.de/resource/supplementary/12939_2013_461_MOESM2_ESM.pdf/9551224)

**A**

Breakdown of Real Per Capita Health Expenditure by Quartile

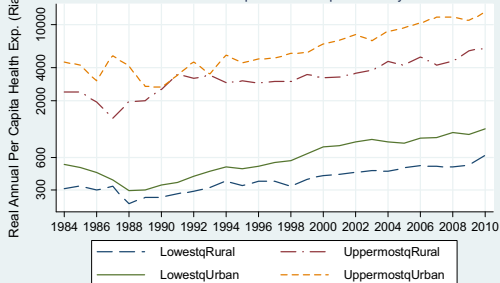

Note: Last top (25%) and low (25%) quartiles used for upper most and lower quartiles.

**B**

Kakwani Progressivity Index, THEXP-Rural &amp; Urban areas

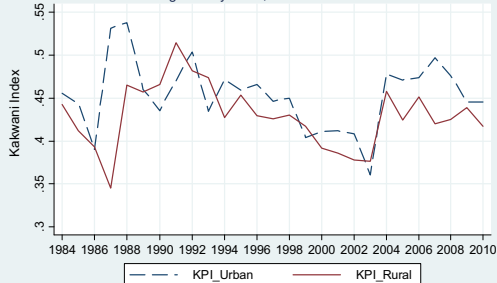

Note:THEXP; Percapita Annual Total Health Exp.

**C**

GC for Total Health Exp. and Total Exp. in Urban Area

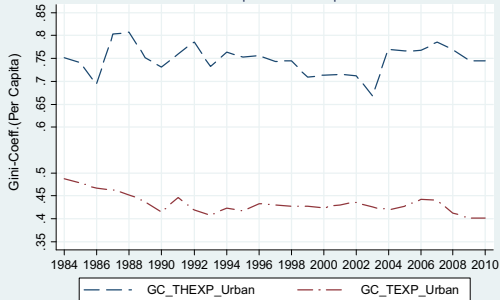**D**

GC for Total Health Exp. and Total Exp. in Rural Area

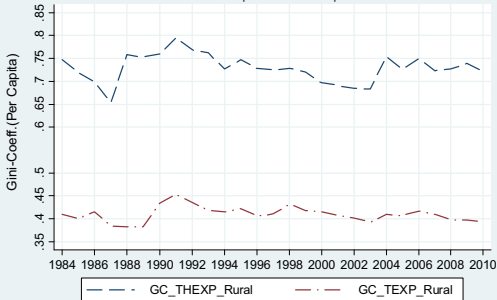

Supplement: MOESM2 [file 9551224]
